# Supplementary material for: Prediction of encephalopathy in perinatal asphyxia score: reaching the unreached
Source: publisher site journal article supplement (doi:10.1515/jpm-2020-0299), 2021-04-15
Supplement: Supplementary file 1 [file j_jpm-2020-0299_suppl.xlsx]

## Sheet: risk calc
	Predicting the risk of developing moderate to severe encephalopathy after perinatal asphyxia
	Thomson HIE score 1			HIE score to be done between 3 to 5 hours of age
	Clinical examination
	Tone	Normal		Neonatal resuscitation
	Consiousness	Normal		None
	Seizure	None
	Posture	Normal		Umbilical artery Lactate
	Moro	Normal		1
	Grasp	Normal		Round off the decimal value
	Suck	Normal
	Resp	Normal		Probability of developing moderate to severe encephalopathy 3
	Fontanel	Normal
	Total score	0
	Likelyhood of abnormal aEEG at 6 hours 2	1	References	0.9		%
		Times more	1. Thompson CM et al. 1997. Acta Paed 86:757-61
			2. Horn et al. 2013. BMC Pediatrics 13:52
			3. White et al. 2012. J MaternFetal Neonatal Med 25:1653-9
	How to use this calculator: select the appropriate value from the dropdown menu in the white coloured cells. The output value pops up in red coloured cells
	Mike & Murthy
	Prediction of Encephalopathy in Perinatal Asphyxia - PEPA calculator

## Sheet: Sheet2
Thomson scoring	0	1	2	3
Sign										Score	LHR
Tone	Normal	Hyper	Hypo			Tone	Normal	0		0	1
Consiousness	Normal	Hyper alert	Lathergy	Comatose		Consiousness	Normal	0		2	1
Seizure	None	Infrequent	Frequent			Seizure	None	0		4	1.3
Posture	Normal	Fist/Cycling	Flexion	Decerebrate		Posture	Normal	0		6	1.8
Moro	Normal	Partial	absent			Moro	Normal	0		7	3
Grasp	Normal	Poor	absent			Grasp	Normal	0		9	4
Suck	Normal	Poor	absent/bites			Suck	Normal	0		10	5.6
Resp	Normal	Hypervent	Brief apneoa	Ventilated		Resp	Normal	0		11	7.7
Fontanel	Normal	Full not tense	Tense			Fontanel	Normal	0	LHR	12	12
							Total	0	1
Tone	Score	Consiousness	Score	Seizure	Score	Posture	Score	Moro	Score	Grasp	Score	Suck	Score	Resp	Score	Fontanel	Score
Normal	0	Normal	0	None	0	Normal	0	Normal	0	Normal	0	Normal	0	Normal	0	Normal	0
Hyper	1	Hyper alert	1	Infrequent	1	Fist/Cycling	1	Partial	1	Poor	1	Poor	1	Hypervent	1	Full	1
Hypo	2	Lathergy	2	Frequent	2	Flexion	2	Absent	2	Absent	2	Absent/Bites	2	Brief apneoa	2	Tense	2
		comatose	3			Decerebrate	3							Ventilated	3
				Lactate
			Neonatal resuscitation	1	2	3	4	5	6	7	8	9	10	11	12
			None	0.009	0.009	0.009	0.009	0.01	0.01	0.01	0.01	0.02	0.03	0.04	0.06
			Blow by oxygen	0.01	0.01	0.02	0.02	0.03	0.05	0.06	0.09	0.12	0.17	0.24	0.33
			CPAP/PPV < 30 secs	0.05	0.07	0.1	0.14	0.2	0.28	0.38	0.53	0.74	1.02	1.41	1.95
			PPV	0.32	0.44	0.61	0.85	1.18	1.63	2.25	3.09	4.25	5.81	7.89	10.64
			Chest compression	1.87	2.58	3.55	4.87	6.64	9	12.08	16.03	20.97	26.93	33.87	41.58
			Drugs	10.24	13.68	18.05	23.43	23.43	37.15	45.09	53.3	61.33	68.78	75.98	80.97
Tone	Normal	Hyper	Hypo				Calculations
Consiousness	Normal	Hyper alert	Lathergy	Comatose				Pretest prob		pretest odds		LHR
Seizure	None	Infrequent	Frequent				None	0.009		0.00908174		1
Posture	Normal	Fist/Cycling	Flexion	Decerebrate			1			post test odds
Moro	Normal	Partial	absent							0.00908174
Grasp	Normal	Poor	absent							post test prob		0	0.9
Suck	Normal	Poor	absent/bites							0.009		100	100
Resp	Normal	Hypervent	Brief apneoa	Ventilated				probability		0.9
Fontanel	Normal	Full	Tense					round off 100		0.9
						None	0.01					0.01
						Blow by oxygen	0.055					0.055
						CPAP	0.33					0.33
						PPV	1.94					1.94
						Chest compression	10.54					10.54
						Drugs	41.12					41.12
